# Supplementary material for: Trans-presentation of IL-15 modulates STAT5 activation and Bcl-6 expression in TH1 cells
Source: PubMed Central journal article supplement (PMC4620557; doi:10.1038/srep15722), 2015-10-26
Supplement: srep15722-s1.pdf [file srep15722-s1.pdf]

## **Supplementary Information**

### **Trans-presentation of IL-15 modulates STAT5 activation and Bcl-6 expression in T<sub>H</sub>1 cells**

Ian D. Cooley, Kaitlin A. Read & Kenneth J. Oestreich

Supplementary Figure S1

Supplementary Figure S2

Supplementary Table S1

Supplementary Table S2

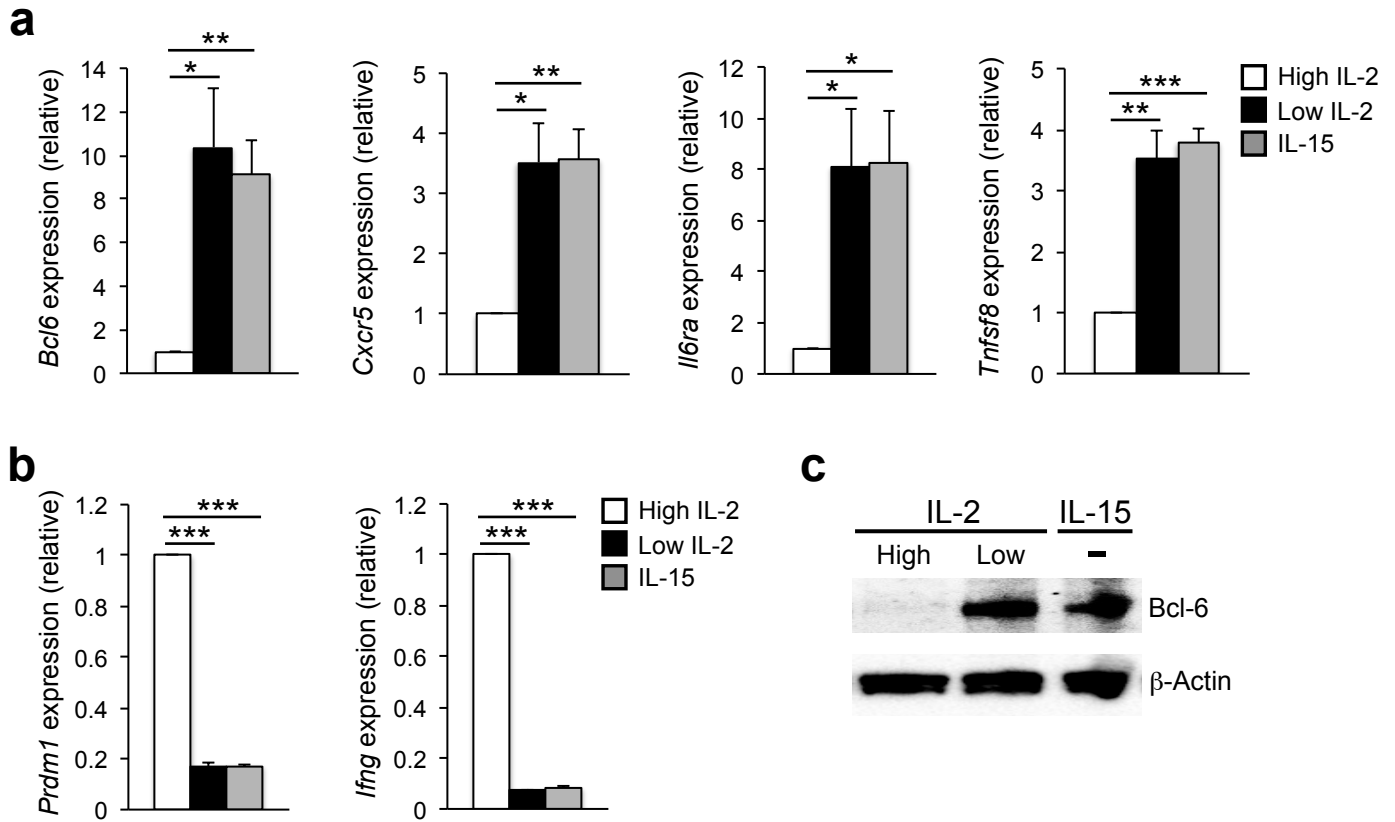

**Supplementary Figure S1. T<sub>H</sub>1 cells maintain flexibility with a T<sub>FH</sub>-like profile after extended culture in T<sub>H</sub>1 conditions.**

Primary CD4<sup>+</sup> T cells were isolated from C57BL/6 mice and stimulated on plate-bound  $\alpha$ CD3 and  $\alpha$ CD28 for 3 days under T<sub>H</sub>1-polarizing conditions. Cells were then split and cultured for additional 2 days under T<sub>H</sub>1-skewing conditions. On day 5, cells were split and cultured with either high IL-2 (250 U/ml), low IL-2 (10 U/ml), or IL-15 (15 ng/ml). (a,b) Two days following cytokine treatment, RNA was isolated to determine transcript levels for the indicated T<sub>FH</sub> and T<sub>H</sub>1-associated genes. Samples were normalized to *Rps18* as a control. Data are presented relative to the high IL-2-treated sample. Three independent experiments were performed with the error bars representing SEM. \**P* < 0.05, \*\**P* < 0.01, \*\*\**P* < 0.001 (unpaired Student's *t*-test). (c) An immunoblot analysis was performed to examine the effect of IL-2 and IL-15 signaling on Bcl-6 expression.  $\beta$ -Actin was monitored to ensure equal protein loading. For (c), the image is representative of three independent experiments.

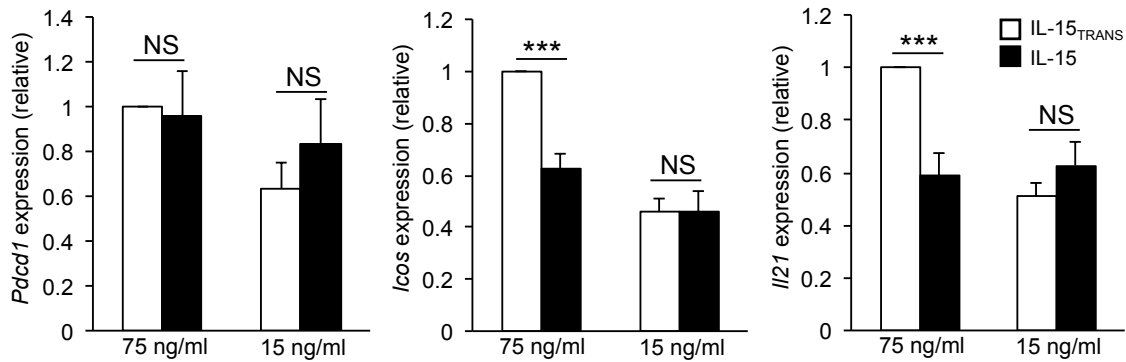

**Supplementary Figure 2. Expression of notable T<sub>FH</sub> genes is independent of IL-15 signaling.** Primary CD4<sup>+</sup> T cells were cultured as described in Figure 2. RNA was isolated to determine transcript levels for *Pdcd1*, *Icos*, and *Il21*. Samples were normalized to *Rps18* as a control and the data are represented relative to the IL-15<sub>TRANS</sub> (75 ng/ml) sample. Six independent experiments were performed with the error bars representing SEM. \*\*\**P* < 0.001 (unpaired Student's *t*-test).

## Supplementary Table S1. Primer sequences

qRT-PCR primer sequences

| Gene           | Species | Sequence (5' to 3')                                         |
|----------------|---------|-------------------------------------------------------------|
| <i>Rps18</i>   | mouse   | fwd: GGAGAACTCACGGAGGATGAG<br>rev: CGCAGCTTGTTGTCTAGACCG    |
| <i>Bcl6</i>    | mouse   | fwd: CCAACCTGAAGACCCACACTC<br>rev: GCGCAGATGGCTCTTCAGAGTC   |
| <i>Cxcr5</i>   | mouse   | fwd: GTACCTAGCCATCGTCCATGC<br>rev: GTGCACTGTGGTAAGGAGTCG    |
| <i>IL6ra</i>   | mouse   | fwd: CCACATAGTGTCACTGTGCG<br>rev: GGTATCGAAGCTGGAAGTGC      |
| <i>Tnfsf8</i>  | mouse   | fwd: GCAGCTACTTCTACCTCAGCAC<br>rev: GTGCCATCTTCGTTCCATGACAG |
| <i>Prdm1</i>   | mouse   | fwd: CTTGTGTGGTATTGTCCGGGAC<br>rev: CACGCTGTA CTCTCTTTGG    |
| <i>lfng</i>    | mouse   | fwd: CTACCTTCTTCAGCAACAGC<br>rev: GCTCATTGAATGCTTGGCGC      |
| <i>Sh2d1a</i>  | mouse   | fwd: CTGGATGGAAGCTATCTGCTG<br>rev: CAGGTGCTGTCTCGGCACTCC    |
| <i>IL12rb1</i> | mouse   | fwd: CACGACTCGGCTCCTCATGGAC<br>rev: TCTCAACGCAGCAGCCATCACC  |
| <i>IL12rb2</i> | mouse   | fwd: CTTGGACGGCATCAGTGTCTGC<br>rev: GACCTGGTGAGGAGCCAGCAAC  |
| <i>Tbx21</i>   | mouse   | fwd: GTCCAAGTTCAACCAGCACC<br>rev: GTTGGTGAGCTTTAGCTTCC      |
| <i>Pdcd1</i>   | mouse   | fwd: CGTCCCTCAGTCAAGAGGAG<br>rev: GTCCCTAGAAGTGCCCAACA      |
| <i>Icos</i>    | mouse   | fwd: CTCACCAAGACCAAGGGAAGC<br>rev: CCACAACGAAAGCTGCACACC    |
| <i>IL21</i>    | mouse   | fwd: TGGATCCTGAACTTCTATCAGCTCC<br>rev: AGGCAGCCTCCTCCTGAGC  |

## Supplementary Table S2. Antibodies

Primary antibodies

| Antibody           | Dilution/Concentration | Species | Clone           | Catalog# | Source          |
|--------------------|------------------------|---------|-----------------|----------|-----------------|
| $\beta$ -actin:HRP | 1:10,000 (WB)          | mouse   | 2D1D10          | A00730   | Genscript       |
| Bcl-6              | 1:500 (WB)             | mouse   | K112-91         | 561520   | BD Biosciences  |
| Blimp-1            | 1:500 (WB)             | rabbit  |                 | A01647   | Genscript       |
| STAT5 (C-17)       | 1:5000 (WB)            | rabbit  |                 | sc-835X  | Santa Cruz      |
| pSTAT5 (pY694)     | 1:5000 (WB)            | mouse   | 47/Stat5(pY694) | 611964   | BD Biosciences  |
| GAPDH (FL-335)     | 1:2500 (WB)            | rabbit  |                 | sc-25778 | Santa Cruz      |
| STAT4 (C-20)       | 1:2500 (WB)            | rabbit  |                 | sc-486   | Santa Cruz      |
| pSTAT4 (pTyr693)   | 1:1000 (WB)            | rabbit  |                 | 5267     | Cell Signalling |
